# Supplementary material
Source: Springer Nature journal article supplement (https://www.springermedizin.de/resource/supplementary/12969_2012_987_MOESM3_ESM.pdf/9589158)
Supplement: MOESM3 [file 9589158]

Very Important

Important

Somewhat Important

Not Important

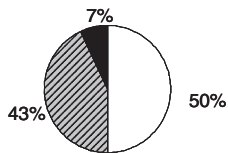

Interactive

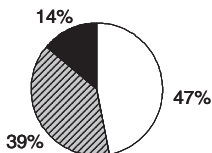

Graphics and animation

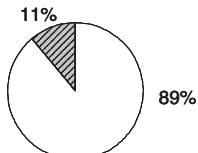

Pictures

(e.g. clinical and pathological slides, radiologic images)

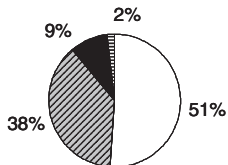

Live digital video

(e.g. demonstrating physical examination techniques)

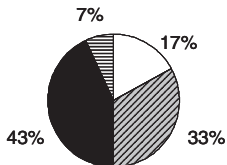

Live audio

(e.g. breath or heart sounds)

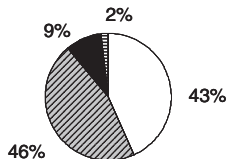

Links to articles, printable summary sheets and research
